# Supplementary material for: Factors Associated with Improvements in Patient-Reported Outcomes During Mirabegron or Antimuscarinic Treatment of Overactive Bladder Syndrome: A Registry Study (PERSPECTIVE)
Source: PubMed Central journal article supplement — Adv Ther. 2019 Jun 20;36(8):1906–21. doi: 10.1007/s12325-019-00994-7 (PMC6822866; doi:10.1007/s12325-019-00994-7), 2019-06-20
Supplement: 12325_2019_994_MOESM1_ESM.pdf [file 12325_2019_994_MOESM1_ESM.pdf]

**Table S1** Institutional Review Boards or Independent Ethics Committees involved in approving the protocol and any associated documents

| Site | PI name           | Site country  | Regulatory/ Ethics type  | Authority name                                    |
|------|-------------------|---------------|--------------------------|---------------------------------------------------|
| 1068 | Acosta, Idalia    | United States | Central IRB              | Quorum Review IRB                                 |
| 1035 | Adegbile, Joy     | United States | Local ethics             | Chesapeake IRB                                    |
| 1049 | Agarwal, Deepali  | United States | Central IRB              | Quorum Review IRB                                 |
| 1059 | Ali, Mohamed      | United States | Central IRB              | Quorum Review IRB                                 |
| 1019 | Allaw, Mohammed   | United States | Central IRB              | Quorum Review IRB                                 |
| 1053 | Allen JR, Gregory | United States | Central IRB              | Quorum Review IRB                                 |
| 1021 | Alwine, Lawrence  | United States | Central IRB              | Quorum Review IRB                                 |
| 1012 | Bakhtari, Ladan   | United States | Central IRB              | Quorum Review IRB                                 |
| 1083 | Barmatz, Mitzi    | United States | Central IRB              | Quorum Review IRB                                 |
| 1084 | Benson, Kevin     | United States | Central IRB              | Quorum Review IRB                                 |
| 1013 | Beshay, Isaac     | United States | Central IRB              | Quorum Review IRB                                 |
| 1031 | Bolet, Juan       | United States | Central IRB              | Quorum Review IRB                                 |
| 1054 | Boyrazian, Hagob  | Canada        | Central IRB              | Quorum Review IRB                                 |
| 1086 | Bradley, Emily    | United States | Central IRB              | Quorum Review IRB                                 |
| 1036 | Bruce, Tami       | United States | Central IRB              | Quorum Review IRB                                 |
| 1105 | Bullock, Travis   | United States | Central IRB              | Quorum Review IRB                                 |
| 1082 | Campbell, David   | United States | Central IRB              | Quorum Review IRB                                 |
| 1026 | Carlson, Kevin    | Canada        | Local ethics             | University of Calgary Conjoint Health REB (CHREB) |
| 1077 | Chastant, Bradley | United States | Central ethics committee | Quorum Review IRB                                 |
| 1111 | Chughtai, Bilal   | United States | Local ethics             | Weill Cornell Medical College IRB                 |
| 1097 | Condit, Jonathan  | United States | Central IRB              | Quorum Review IRB                                 |
| 1103 | Danforth, Teresa  | United States | Local ethics             | University at Buffalo IRB                         |
| 1112 | Dao, Michael      | United States | Central IRB              | Quorum Review IRB                                 |
| 1009 | Davis, Cedrice    | United States | Central IRB              | Quorum Review IRB                                 |
| 1011 | De Beixedon, John | United States | Central IRB              | Quorum Review IRB                                 |
| 1015 | DeLaurentis, Dino | United States | Central IRB              | Quorum Review IRB                                 |
| 1095 | Dhillon, Ripple   | Canada        | Central IRB              | Quorum Review IRB                                 |
| 1060 | Drabick, Andrew   | United States | Central IRB              | Quorum Review IRB                                 |
| 1096 | Efros, Mitchell   | United States | Central IRB              | Quorum Review IRB                                 |
| 1038 | Eiley, David      | Canada        | Central IRB              | Quorum Review IRB                                 |

| <b>Site</b> | <b>PI name</b>         | <b>Site country</b> | <b>Regulatory/ Ethics type</b> | <b>Authority name</b>                                              |
|-------------|------------------------|---------------------|--------------------------------|--------------------------------------------------------------------|
| 1114        | Eltahawy, Ehab         | United States       | Central IRB                    | Quorum Review IRB                                                  |
| 1092        | Elterman, Dean         | Canada              | Local ethics                   | UHN REB                                                            |
| 1027        | Erdelyi, Barbara       | Canada              | Central IRB                    | Quorum Review IRB                                                  |
| 1050        | Fernandez, Manuel      | United States       | Central IRB                    | Quorum Review IRB                                                  |
| 1007        | Florea, Robert         | United States       | Central IRB                    | Quorum Review IRB                                                  |
| 1113        | Flynn, Brian           | United States       | Local ethics                   | Colorado Multiple IRB University of Colorado                       |
| 1108        | Fok, Cynthia           | United States       | Local ethics                   | University of Minnesota                                            |
| 1028        | Francyk, David         | United States       | Central IRB                    | Quorum Review IRB                                                  |
| 1098        | Garcia-Sellek, Basilio | United States       | Central IRB                    | Quorum Review IRB                                                  |
| 1089        | Glazier, Wayne         | United States       | Central IRB                    | Quorum Review IRB                                                  |
| 1030        | Golden, Gordon         | United States       | Central IRB                    | Quorum Review IRB                                                  |
| 1085        | Guzman, Edwin          | United States       | Local ethics                   | Committee for the Protection of Human Subjects in Research (CPHSR) |
| 1055        | Herman, Craig          | United States       | Central IRB                    | Quorum Review IRB                                                  |
| 1065        | Hickling, Duane        | Canada              | Local ethics                   | Ottawa Hospital REB                                                |
| 1042        | Hill, Brian            | United States       | Local ethics                   | Sterling Independent Review Board                                  |
| 1001        | Holgado, Maynard       | United States       | Central IRB                    | Quorum Review IRB                                                  |
| 1073        | Hunter, Robert         | United States       | Central IRB                    | Quorum Review IRB                                                  |
| 1032        | Iglesias, Rogelio      | United States       | Central IRB                    | Quorum Review IRB                                                  |
| 1034        | Inzerello, Anthony     | United States       | Central IRB                    | Quorum Review IRB                                                  |
| 1006        | Jain, Pankaj           | United States       | Central IRB                    | Quorum Review IRB                                                  |
| 1022        | Jansz, Godfrey         | Canada              | Central IRB                    | Quorum Review IRB                                                  |
| 1064        | Jordan, Staci          | United States       | Central IRB                    | Quorum Review IRB                                                  |
| 1100        | Kalota, Susan          | United States       | Central IRB                    | Quorum Review IRB                                                  |
| 1045        | Katz, Daniel           | United States       | Central IRB                    | Quorum Review IRB                                                  |
| 1017        | Kay, Jennifer          | United States       | Central IRB                    | Quorum Review IRB                                                  |
| 1000        | Kinahan, John          | Canada              | Central IRB                    | Quorum Review IRB                                                  |
| 1058        | Krejci, Kent           | United States       | Central IRB                    | Quorum Review IRB                                                  |
| 1062        | Krishna, Harshavardhan | United States       | Central IRB                    | Quorum Review IRB                                                  |
| 1033        | Kurtz, Michael         | United States       | Central IRB                    | Quorum Review IRB                                                  |
| 1016        | Leavitt, Glenn         | United States       | Central IRB                    | Quorum Review IRB                                                  |
| 1020        | Lester, Frank          | United States       | Central IRB                    | Quorum Review IRB                                                  |

| <b>Site</b> | <b>PI name</b>          | <b>Site country</b> | <b>Regulatory/ Ethics type</b> | <b>Authority name</b>                                                   |
|-------------|-------------------------|---------------------|--------------------------------|-------------------------------------------------------------------------|
| 1078        | Lindenbaum, Jeffrey     | United States       | Central IRB                    | Quorum Review IRB                                                       |
| 1079        | Lorites, Jesus          | United States       | Central IRB                    | Quorum Review IRB                                                       |
| 1029        | Love, William           | Canada              | Central IRB                    | Quorum Review IRB                                                       |
| 1023        | Luton, Robert           | Canada              | Central IRB                    | Quorum Review IRB                                                       |
| 1075        | Maggiolo, Luis          | United States       | Central IRB                    | Quorum Review IRB                                                       |
| 1004        | Mahood, Karen           | United States       | Central IRB                    | Quorum Review IRB                                                       |
| 1102        | McCrery, Rebecca        | United States       | Central IRB                    | Quorum Review IRB                                                       |
| 1010        | McMurray, James         | United States       | Central IRB                    | Quorum Review IRB                                                       |
| 1101        | Mikhail, Ashraf         | Canada              | Central IRB                    | Quorum Review IRB                                                       |
| 1099        | Miles-Thomas, Jennifer  | United States       | Central IRB                    | Quorum Review IRB                                                       |
| 1076        | Mitcheson, Henry        | United States       | Central IRB                    | Quorum Review IRB                                                       |
| 1043        | Molin, Clifford         | United States       | Central IRB                    | Quorum Review IRB                                                       |
| 1071        | Moore, Nathan           | United States       | Central IRB                    | Quorum Review IRB                                                       |
| 1090        | Morgan, Matthew         | United States       | Central IRB                    | Quorum Review IRB                                                       |
| 1005        | Moskalyk, Tara          | Canada              | Central IRB                    | Quorum Review IRB                                                       |
| 1088        | Mourtzinos, Arthur      | United States       | Local ethics                   | Lahey Clinic                                                            |
| 1041        | Nevarez, Max            | United States       | Central IRB                    | Quorum Review IRB                                                       |
| 1052        | Nowins, Rosemary        | United States       | Central IRB                    | Quorum Review IRB                                                       |
| 1081        | Otts, Richard           | United States       | Central IRB                    | Quorum Review IRB                                                       |
| 1057        | Pimentel, Severino      | United States       | Central IRB                    | Quorum Review IRB                                                       |
| 1047        | Reed, Larry             | United States       | Central IRB                    | Quorum Review IRB                                                       |
| 1048        | Robbins, Bryan          | United States       | Central IRB                    | Quorum Review IRB                                                       |
| 1104        | Rothschild, Jennifer    | United States       | Local ethics                   | University of California, Davis Office of Research – IRB Administration |
| 1008        | Rudolph, Lance          | United States       | Central IRB                    | Quorum Review IRB                                                       |
| 1109        | Rutman, Matthew         | United States       | Local ethics                   | Columbia University                                                     |
| 1074        | Sandberg, Jay           | United States       | Central IRB                    | Quorum Review IRB                                                       |
| 1037        | Sattar, Tasleyma (Bibi) | United States       | Central IRB                    | Quorum Review IRB                                                       |
| 1106        | Shah, Sovrin            | United States       | Central IRB                    | Quorum Review IRB                                                       |
| 1066        | Shu, Daniel             | Canada              | Central IRB                    | Quorum Review IRB                                                       |
| 1061        | Simpson, Steve          | United States       | Central IRB                    | Quorum Review IRB                                                       |
| 1040        | Singh, Jaspreet         | United States       | Central IRB                    | Quorum Review IRB                                                       |

| <b>Site</b> | <b>PI name</b>                         | <b>Site country</b> | <b>Regulatory/ Ethics type</b> | <b>Authority name</b> |
|-------------|----------------------------------------|---------------------|--------------------------------|-----------------------|
| 1072        | Steele, Steven                         | Canada              | Local ethics                   | Health Sciences REB   |
| 1044        | Suarez-Sarmiento, Alfredo              | United States       | Central IRB                    | Quorum Review IRB     |
| 1051        | Summers, William                       | United States       | Central IRB                    | Quorum Review IRB     |
| 1093        | Taylor, Kelly                          | United States       | Central IRB                    | Quorum Review IRB     |
| 1070        | Teixeira, Gilbert                      | United States       | Central IRB                    | Quorum Review IRB     |
| 1069        | Thomas, Ben                            | United States       | Central IRB                    | Quorum Review IRB     |
| 1107        | Titus, John                            | United States       | Central IRB                    | Quorum Review IRB     |
| 1080        | Troyan, Barry                          | United States       | Central IRB                    | Quorum Review IRB     |
| 1091        | Trullenque, Gretel                     | United States       | Central IRB                    | Quorum Review IRB     |
| 1110        | Tunuguntla, Hari Siva<br>Gurunadha Rao | United States       | Local ethics                   | Western IRB (WIRB)    |
| 1056        | Tyson, Treva                           | United States       | Central IRB                    | Quorum Review IRB     |
| 1018        | Valor, Elena                           | United States       | Central IRB                    | Quorum Review IRB     |
| 1094        | Vaughn, Michael                        | United States       | Central IRB                    | Quorum Review IRB     |
| 1039        | Woodruff, Mark                         | United States       | Central IRB                    | Quorum Review IRB     |
| 1046        | Wu, Ning                               | United States       | Central IRB                    | Quorum Review IRB     |
| 1025        | Zahavi, Michael                        | Canada              | Central IRB                    | Quorum Review IRB     |
| 1014        | Zidel, Brian                           | Canada              | Central IRB                    | Quorum Review IRB     |

*IRB* Institutional Review Board, *PI* principal investigator, *REB* Research Ethics Board, *UHN* University Health Network
